# Supplementary material for: Two isoreticular metal–organic frameworks with CdSO4-like topology: selective gas sorption and drug delivery
Source: Royal Society of Chemistry journal article supplement (doi:10.1039/c4dt01890g), 2014-01-01
Supplement: c4dt01890g1.pdf [file c4dt01890g1.pdf]

## Two isorecticular metal–organic frameworks with $\text{CdSO}_4$ -like topology: selective gas sorption and drug delivery

Content

Detailed structural description of **1** and **2**

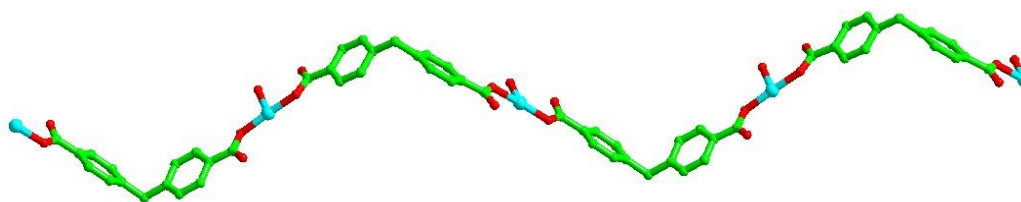

Fig. S1 A single  $[\text{Cu}(\text{L})]_n$  chain motif in **1**.

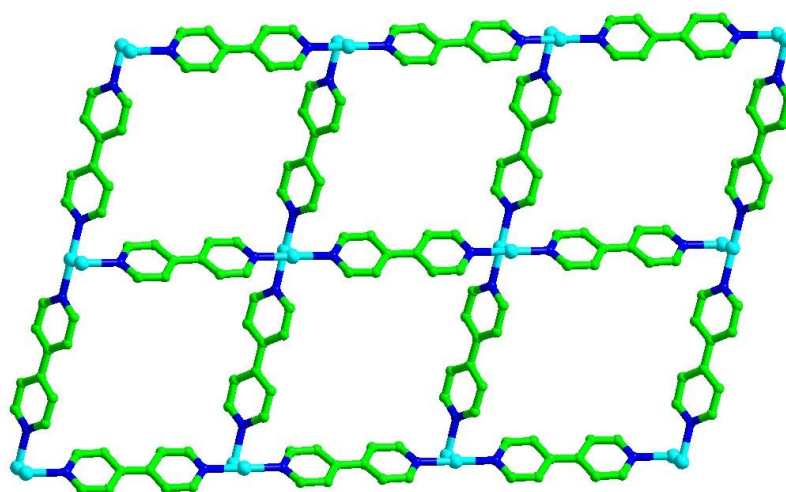

Fig. S2 Two mutually orthogonal sets the  $[\text{Cu}(4,4'\text{-bipy})]_n$  in **1**

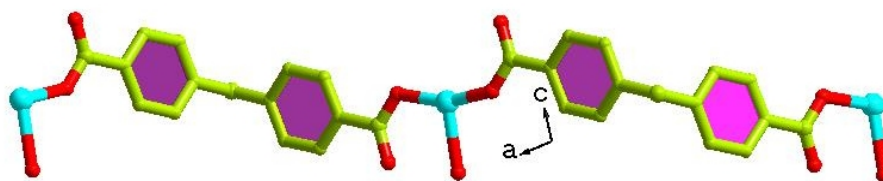

Fig. S3 View of the chain of  $[\text{Cu}(\text{H}_2\text{O})(\text{L})]_n$

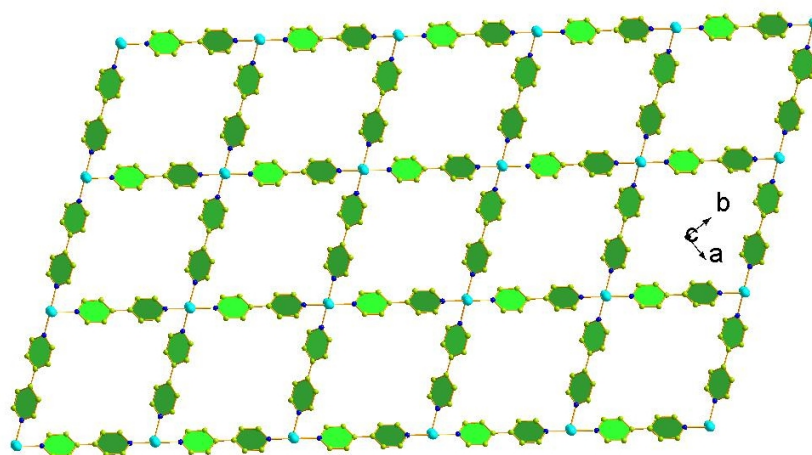

Fig. S4 Two mutually orthogonal sets the  $[\text{Cu}(4,4'\text{-bipy})]_n$  in **2**

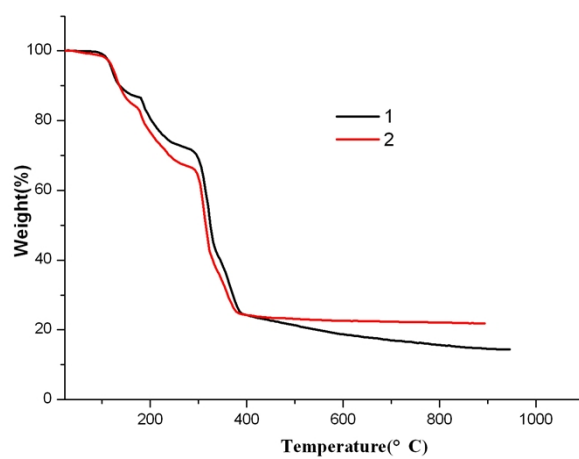

Fig. S5 view of TGA in compounds **1-2**.

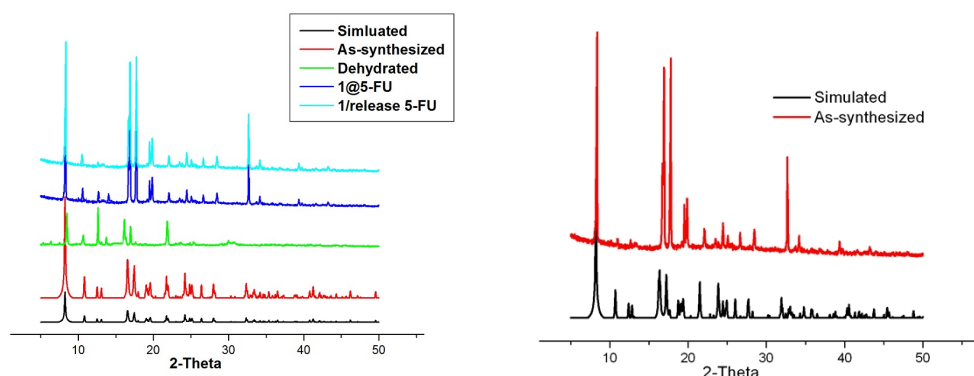

Fig. S6 Comparison of XRPD patterns of the simulated pattern from the single-crystal structure determination, the as-synthesized product, desolvated sample, 5-FU containing sample and after 5-Fu release sample in compound **1** and Comparison of XRPD patterns of the simulated pattern from the single-crystal structure determination and the as-synthesized product in **2**.

Table S1 different calculated potential gas adsorption feature in **1**

| Probe sphere radius (Å) | Guest molecule  | potential porosity (m <sup>2</sup> .g <sup>-1</sup> )<br>1) |
|-------------------------|-----------------|-------------------------------------------------------------|
| 1.3                     | He              | 1773(9)                                                     |
| 1.45                    | H <sub>2</sub>  | 1700(7)                                                     |
| 1.65                    | CO <sub>2</sub> | 1680(20)                                                    |
| 1.7                     | Ar              | 1657(20)                                                    |
| 1.8                     | N <sub>2</sub>  | 1586(15)                                                    |
| 1.9                     | CO              | 1541(13)                                                    |

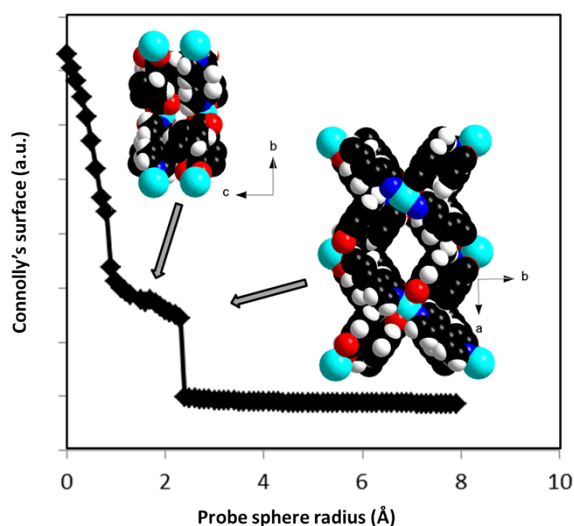

Fig S7. Porosity profile for the compound **1**

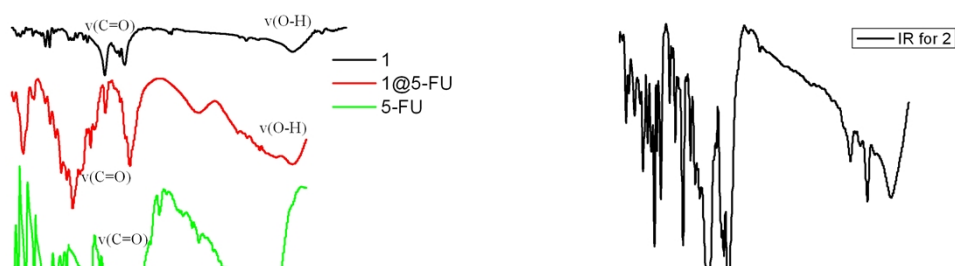

Fig S8 IR spectra of 5-FU (green), **1** loaded with 5-FU (red) and **1** (black) and the IR spectra of **2**(right).

### Drug Loading

To load 5-fluorouracil (5-FU) into the pores of **1**, dehydrated **1** (10 mg) was dispersed in a 5-FU (20 mg) containing ethanol solution (5 mL) and stirred for 5 days yielding homogenous light solution, followed by centrifugation and washing extensively with DMSO to obtain the drug-loaded **1**. The adsorbed amount of 5-Fu into the porous solids was estimated by HPLC, and FTIR.

### Determination of the 5-Fluorouracil Content

Optimisation of 5-Fu adsorption

**Table S2.** Estimated f-Fu content = f(several impregnation parameters).

Table S2 5-FU drug loading rate of MOFs

| m(MOFs)/<br>m(5-FU) | Drug content m(5-FU)/m(MOFs) |               |               |               |
|---------------------|------------------------------|---------------|---------------|---------------|
|                     | 1d                           | 3d            | 5d            | 7d            |
| 1:1                 | 0.201 ± 0.011                | 0.217 ± 0.014 | 0.259 ± 0.013 | 0.223 ± 0.016 |
| 1:2                 | 0.180 ± 0.031                | 0.239 ± 0.011 | 0.275 ± 0.017 | 0.229 ± 0.014 |
| 1:3                 | 0.193 ± 0.019                | 0.211 ± 0.013 | 0.221 ± 0.012 | 0.215 ± 0.029 |

### Drug Release

The release of 5-FU from 5-FU-loaded **1** was evaluated using a semi-permeable dialysis bag diffusion technique right after the 5-FU loading. The as-prepared 5-FU-loaded **1** was dispersed in 500 mL PBS (pH 7.4). The release mediums was placed into pretreated semi permeable dialysis bags and then immersed into 5 mL PBS at 37 °C with gentle shaking. At certain time intervals, 5-FU concentration moved out of semi-premeable dialysis dag into water was measured by HPLC.

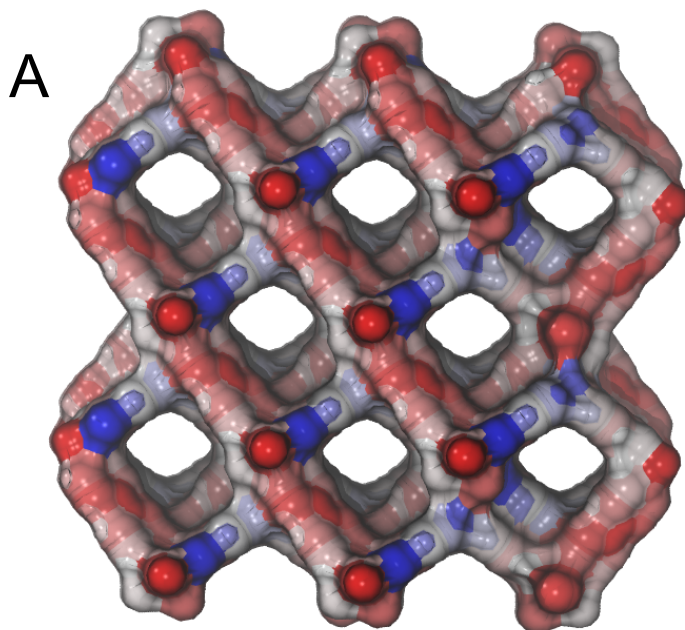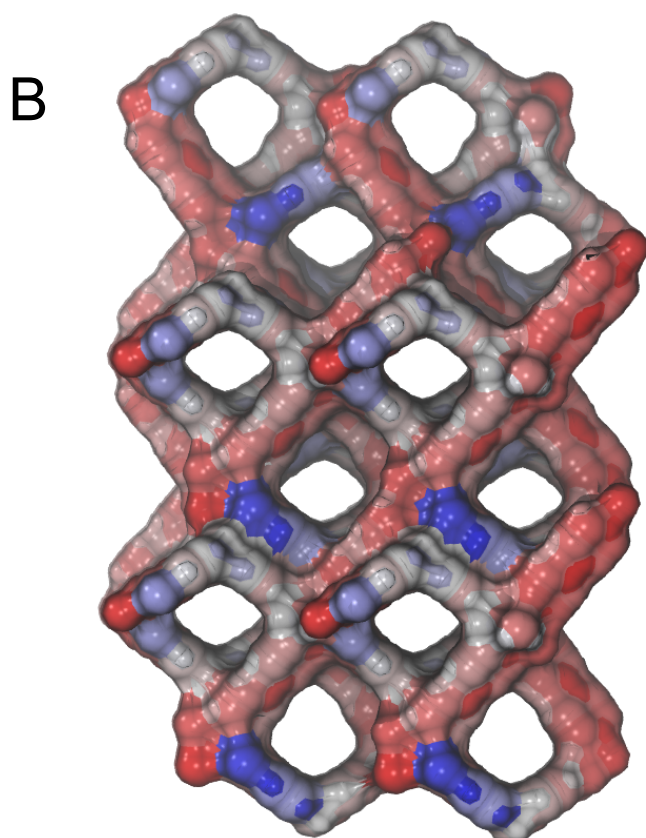

Fig. S9 Structural comparison of metal-organic frameworks **1** (A) and **2** (B) with respect to pore dimensions and charge distribution derived from the chemical environment of the pores.

The detailed **topological analysis**

#####

1:C100 H Cu4 N8 O28

#####

## Topology for 1

-----

Atom Cu1 links by bridge ligands and has

| Common vertex with |         |         |        |           | R(A-A)  | f |
|--------------------|---------|---------|--------|-----------|---------|---|
| Cu 1               | 0.2526  | 0.7480  | 1.0399 | ( 1 1 2)  | 11.163A | 1 |
| Cu 1               | 1.2526  | -0.2520 | 1.0399 | ( 2 0 2)  | 11.170A | 1 |
| Cu 1               | -0.2526 | 0.2480  | 0.4601 | (-1 0 -1) | 13.873A | 1 |
| Cu 1               | 1.7474  | 0.2480  | 1.4601 | ( 1 0 0)  | 13.873A | 1 |

-----

## Structural group analysis

-----

-----

## Structural group No 1

-----

Structure consists of 3D framework with CuO4N2C25H18

## Coordination sequences

-----

|      |   |    |    |     |     |     |     |     |      |      |
|------|---|----|----|-----|-----|-----|-----|-----|------|------|
| Cu1: | 1 | 2  | 3  | 4   | 5   | 6   | 7   | 8   | 9    | 10   |
| Num  | 4 | 12 | 30 | 58  | 94  | 138 | 190 | 250 | 318  | 394  |
| Cum  | 5 | 17 | 47 | 105 | 199 | 337 | 527 | 777 | 1095 | 1489 |

-----

TD10=1489

## Vertex symbols for selected sublattice

-----

Cu1 Point symbol: {6<sup>5</sup>.8}

Extended point symbol:[6.6.6.6(2).8(2)]

-----

Point symbol for net: {6<sup>5</sup>.8}

4-c net; uninodal net

Topological type: cds CdSO4; 4/6/t4; sqc5 (topos&RCSR.ttd) {6<sup>5</sup>.8} - VS [6.6.6.6(2).\*] (71801 types in 11 databases)

-----

## Non-equivalent circuits

-----

Circuit No 1; Type=6a; Centroid: (0.000,0.500,0.000)

-----

```
#####
2:[Cu (H2 O) (C10 H8 N2) (C15 H10 O4)], 4H2 O
#####
```

# Topology for 2

Atom Cu1 links by bridge ligands and has

| Common vertex with |         |        |        |          | R(A-A)  | f |
|--------------------|---------|--------|--------|----------|---------|---|
| Cu 1               | 1.0000  | 1.0000 | 0.5000 | ( 1 1 1) | 11.276A | 1 |
| Cu 1               | 0.0000  | 0.0000 | 0.5000 | ( 0 0 1) | 11.276A | 1 |
| Cu 1               | 1.5000  | 0.5000 | 1.0000 | ( 2 0 1) | 13.840A | 1 |
| Cu 1               | -0.5000 | 0.5000 | 0.0000 | ( 0 0 0) | 13.840A | 1 |

## Structural group analysis

## Structural group No 1

Structure consists of 3D framework with CuO4N2C25H17

## Coordination sequences

```
Cu1:  1  2  3  4  5  6  7  8  9  10
Num   4 12 30  58  94 138 190 250  318  394
Cum    5 17 47 105 199 337 527 777 1095 1489
```

TD10=1489

## Vertex symbols for selected sublattice

```
Cu1 Point symbol: {6^5.8}
Extended point symbol:[6.6.6.6.6(2).8(2)]
```

```
Point symbol for net: {6^5.8}
4-c net; uninodal net
```

Topological type: cds CdSO4; 4/6/t4; sqc5 (topos&RCSR.ttd) {6^5.8} - VS [6.6.6.6.6(2).\*] (73010 types in 11 databases)  
Elapsed time: 8.99 sec.
